# Supplementary material for: Respiratory sinus arrhythmia and submersion bradycardia in bottlenose dolphins (Tursiops truncatus)
Source: Oxford University Press journal article supplement (doi:10.1242/jeb.234096), 2020-11-30

Supplementary Information

**Table S1. Animal ID (ID), body mass, ( $M_b$ ), average interbreath interval (IBI) and average heart rate ( $f_H$ ) during fasted (F) and non-fasted trials (NF) at the surface where the dolphin breathes spontaneously, and during 2-minute breath-holds (BH).**

| ID             | $M_b$ (kg)        | IBI <sub>F</sub> (s) | IBI <sub>NF</sub> (s) | IBI <sub>BH</sub> (s) | $f_{H, F}$ (beats min <sup>-1</sup> ) | $f_{H, NF}$ (beats min <sup>-1</sup> ) | $f_{H, BH}$ (beats min <sup>-1</sup> ) |
|----------------|-------------------|----------------------|-----------------------|-----------------------|---------------------------------------|----------------------------------------|----------------------------------------|
| 83H1           | 147.0             | 28.3±17.6            | 13.6±9.2              | 121.6                 | 56.3±8.8                              | 72.1±8.1                               | 46.2±23.3                              |
| 01L5           | 163.7             | -                    | 15.1±6.9              | -                     | -                                     | 86.7±9.2                               | -                                      |
| 6JK5           | 200.9             | 14.6±9.6             | 13.6±9.3              | 117.1±8.1             | 73.1±8.5                              | 78.5±5.5                               | 59.1±1.5                               |
| 9ON6           | 192.8             | 16.4±10.9            | 17.2±6.8              | 128.9                 | 72.2±8.2                              | 72.4±6.4                               | 50.2±12.1                              |
| 63H4           | 179.6             | -                    | 12.0±4.4              | 130.3±6.3             | -                                     | 98.6±5.3                               | 97.4±3.2                               |
| 9FL3           | 251.7             | 26.5±17.0            | 15.6±8.4              | 135.8                 | 58.6±12.4                             | 61.7±9.8                               | 42.7±6.3                               |
| <b>Average</b> | <b>189.3±36.3</b> | <b>19.7±14.3</b>     | <b>14.6±8.0</b>       | <b>125.9±8.4</b>      | <b>67.2±11.8</b>                      | <b>78.0±13.1</b>                       | <b>64.6±23.3</b>                       |

**Table S2. Characteristics of respiratory sinus arrhythmia (RSA) during surface, fasted trials and non-fasted trials, and submerged breath-hold trials.**

| ID (n = # of breaths) | RSA (%)    | RSA (s)   | Maximum $\dot{f}_H$ (beats min <sup>-1</sup> ) | Minimum $\dot{f}_H$ (beats min <sup>-1</sup> ) |
|-----------------------|------------|-----------|------------------------------------------------|------------------------------------------------|
| <b>83H1</b>           |            |           |                                                |                                                |
| Fasted (n = 41)       | 70.2±25.9  | 0.82±0.31 | 77.4±14.8                                      | 38.5±8.1                                       |
| Non-fasted (n = 48)   | 37.2±17.1  | 0.36±0.20 | 83.6±7.6                                       | 57.5±11.5                                      |
| Breath-hold (n = 1)   | 209.7      | 0.21      | 120.0                                          | 23.0                                           |
| <b>01L5</b>           |            |           |                                                |                                                |
| Fasted                | -          | -         | -                                              | -                                              |
| Non-fasted (n = 58)   | 49.5±14.1  | 0.41±0.16 | 105.4±8.6                                      | 63.3±12.5                                      |
| Breath-hold           | -          | -         | -                                              | -                                              |
| <b>6JK5</b>           |            |           |                                                |                                                |
| Fasted (n = 81)       | 25.5±13.1  | 0.24±0.22 | 82.0±9.2                                       | 63.7±10.1                                      |
| Non-fasted (n = 46)   | 26.9±13.4  | 0.22±0.13 | 88.2±4.2                                       | 67.6±8.9                                       |
| Breath-hold (n = 2)   | 107.4±53.2 | 0.76±0.13 | 108.6±34.9                                     | 44.8±1.9                                       |
| <b>9ON6</b>           |            |           |                                                |                                                |
| Fasted (n = 74)       | 43.1±15.9  | 0.40±0.18 | 86.8±9.7                                       | 56.1±9.7                                       |
| Non-fasted (n = 33)   | 42.6±11.7  | 0.39±0.13 | 86.8±7.9                                       | 56.1±7.0                                       |
| Breath-hold (n = 1)   | 109.5      | 0.11      | 89.9                                           | 34.9                                           |
| <b>63H4</b>           |            |           |                                                |                                                |
| Fasted                | -          | -         | -                                              | -                                              |
| Non-fasted (n = 25)   | 32.8±15.2  | 0.23±0.15 | 111.7±4.3                                      | 79.9±12.0                                      |
| Breath-hold (n = 2)   | 51.6±7.5   | 0.38±0.09 | 118.0±2.9                                      | 67.6±6.0                                       |
| <b>9FL3</b>           |            |           |                                                |                                                |
| Fasted (n = 45)       | 72.2±24.6  | 0.84±0.35 | 80.4±13.4                                      | 39.7±10.8                                      |
| Non-fasted (n = 36)   | 59.2±21.4  | 0.65±0.28 | 80.1±12.3                                      | 44.1±8.9                                       |
| Breath-hold (n = 1)   | 82.2       | 0.90      | 69.2                                           | 34.0                                           |

**Table S3. Results of linear mixed effects models of the effect of the previous inter-breath interval (IBI) duration on the maximum  $if_H$  of the IBI and the difference between the maximum  $if_H$  of the IBI and the minimum  $if_H$  of the previous IBI during surface breathing trials.** Data were  $\log_{10}$ -transformed for analysis. Individual ID was included as a random effect and nutritional state (fasted vs. non-fasted) was included as a fixed effect.

| <b>Response variable</b>                                               | <b>Independent variables</b>       | <b>Value</b> | <b>S.E.</b> | <b>P-value</b>    |
|------------------------------------------------------------------------|------------------------------------|--------------|-------------|-------------------|
| Maximum $if_H$ (beats $\text{min}^{-1}$ )                              | nutritional state                  | -0.07        | 0.02        | <b>&lt;0.01</b>   |
|                                                                        | previous IBI                       | -0.07        | 0.01        | <b>&lt;0.0001</b> |
|                                                                        | nutritional state*<br>previous IBI | 0.05         | 0.02        | <b>0.02</b>       |
| Maximum $if_H$ – previous<br>Minimum $if_H$ (beats $\text{min}^{-1}$ ) | nutritional state                  | -0.12        | 0.07        | 0.09              |
|                                                                        | previous IBI                       | 0.23         | 0.04        | <b>&lt;0.0001</b> |
|                                                                        | nutritional state*<br>previous IBI | 0.10         | 0.06        | 0.08              |

Figure S1. Effect of duration of the previous inter-breath interval (IBI) on A) maximum  $if_H$  and B) the difference between the maximum  $if_H$  of the IBI and the minimum  $if_H$  of the previous IBI during surface breathing trials. Data were  $\log_{10}$ -transformed for plotting.

Fasted data points are plotted in red and non-fasted data points are plotted in blue.

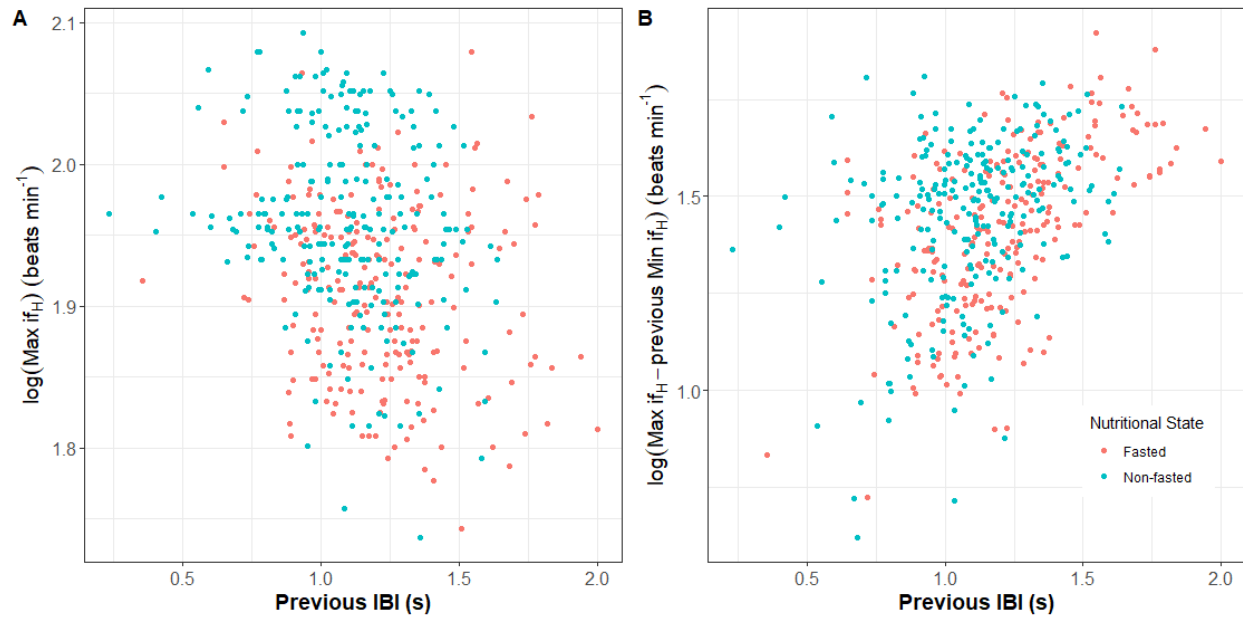

Supplement: jeb234096supp.pdf [file jeb234096supp.pdf]
